# Supplementary material for: Incidence, Survival, and Treatment of Localized and Metastatic Neuroblastoma in Germany 1979–2015
Source: PubMed Central journal article supplement — Paediatr Drugs. 2017 Aug 7;19(6):577–93. doi: 10.1007/s40272-017-0251-3 (PMC5680382; doi:10.1007/s40272-017-0251-3), 2017-08-07
Supplement: 40272_2017_251_MOESM1_ESM.pdf [file 40272_2017_251_MOESM1_ESM.pdf]

# Incidence, survival, and treatment of localized and metastatic neuroblastoma in Germany 1979-2015

Frank Berthold<sup>1</sup>, Claudia Spix<sup>2</sup>, Peter Kaatsch<sup>2</sup>, Fritz Lampert<sup>3</sup>

<sup>1</sup>Department of Pediatric Oncology and Hematology, Children's Hospital, University of Cologne, Germany.

<sup>2</sup>Institute of Medical Biostatistics, Epidemiology and Informatics, University Medical Center Mainz, Germany.

<sup>3</sup>Department of Pediatric Oncology and Hematology, Children's Hospital, University of Giessen, Germany.

## Supplemental material

|                               |                                                                                                             |
|-------------------------------|-------------------------------------------------------------------------------------------------------------|
| <b>Supplemental Table S1</b>  | Treatment schemes for patients with localized neuroblastoma                                                 |
| <b>Supplemental Table S2</b>  | Chemotherapy cycles as used in the German trials NB79-NB2004                                                |
| <b>Supplemental Table S3</b>  | Treatment schemes for patients with stage 4S neuroblastoma                                                  |
| <b>Supplemental Table S4</b>  | Additional treatment elements in HR neuroblastoma                                                           |
| <b>Supplemental Table S5</b>  | Standard induction and myeloablative chemotherapy 2017 for high-risk neuroblastoma.                         |
| <b>Supplemental Table S6</b>  | Sites of primary tumors by trial (all stages)                                                               |
| <b>Supplemental Table S7</b>  | Sites of metastases in patients with stage 4 $\geq$ 18 months old by trial                                  |
| <b>Supplemental Table S8</b>  | Proportion of 5, 10, 15, and 20-year event-free survival of neuroblastoma subgroups                         |
| <b>Supplemental Table S9</b>  | Proportion of 5, 10, 15, and 20-year overall survival of neuroblastoma subgroups                            |
| <b>Supplemental Figure S1</b> | Schematic overview of the treatment elements for high-risk neuroblastoma therapy for the trials NB79-NB2004 |
| <b>Supplemental Figure S2</b> | Survival of 2664 patients with non-amplified MYCN neuroblastoma by stage and age. Trials NB90, NB97, NB2004 |

**Supplemental Table S1** Treatment schemes for patients with localized neuroblastoma (stages 1-3 according to Evans et al. for NB 79-NB85 [9] and according to INSS [6] for NB90-NB2004)

| Trial  | Surgery                                                                                                                                                                | Chemotherapy                                                                                                                                                                                                                      | Radiotherapy                                                                   |
|--------|------------------------------------------------------------------------------------------------------------------------------------------------------------------------|-----------------------------------------------------------------------------------------------------------------------------------------------------------------------------------------------------------------------------------|--------------------------------------------------------------------------------|
| NB 79  | 1,2,3: at diagnosis                                                                                                                                                    | 1,2: none<br>3: 3 cycle ACVD or 5 cycles AC                                                                                                                                                                                       | II: local<br>III: progressing tumors                                           |
| NB 82  | 1,2,3: at diagnosis                                                                                                                                                    | 1: none<br>2: w/o regional lymph nodes: none; with regional lymph nodes: 3 cycles AC                                                                                                                                              | I: none<br>II: none                                                            |
| NB 85  | 3: 2nd look after chemotherapy<br>1,2,3: at diagnosis                                                                                                                  | 3: 2 cycles ACVD and 2 cycles PCVm<br>1: none<br>2: w/o regional lymph nodes: none; with regional lymph nodes: 3 cycles AC                                                                                                        | 3: 30 Gy at residual tumor                                                     |
| NB 90  | 3: 2nd look after chemotherapy (± radiotherapy)<br>1,2,3: at diagnosis<br>2,3: 2nd look after chemotherapy                                                             | 3: 2 cycles ACVD + 2 cycles PCVm, poor response: + 3 cycles Ivp<br>1: none<br>2,3A/B: 2 cycles N1 and 2 cycles N2<br>3C/D: 4 cycles N1 and 4 cycles N2, or 6 cycles D1 and 6 cycles D2 (1y)                                       | III: 24-30 Gy at residual tumor<br>3C/D: 24 Gy ≤3 y., 30 Gy >3 y. at tumor bed |
| NB 97  | <1y 1,2,3 and >1y 1,2 resectable: at diagnosis ± 2nd look after 6-12 months<br><1y 1,2,3 with symptoms, 3: at diagnosis biopsy or removal, 2nd look after chemotherapy | none<br>none                                                                                                                                                                                                                      | none<br>none                                                                   |
| NB2004 | 1,2,3 observation group: at diagnosis, residuals after 1-2 years: 2nd look<br>2,3,4 medium risk group: at diagnosis, 2nd look after chemotherapy                       | 2 unresectable, 3: 2 cycles N5 and 2 cycles N6<br>1,2,3, with threatening symptoms or localized progression: N4 cycles (2-4) until stable<br>2,3,4 medium risk group: 3 cycles N5, or 3 cycles N6, or 4 cycles N7, or 9 cycles RA | none<br>36-40 Gy at primary tumor (mIBG uptake after chemotherapy)             |

**Supplemental Table S2** Chemotherapy cycles as used in the German trials NB79-NB2004

| Designation | Trial     | Number of cycles |        | Drugs                                                                                                                                                                                                              |
|-------------|-----------|------------------|--------|--------------------------------------------------------------------------------------------------------------------------------------------------------------------------------------------------------------------|
|             |           | HR               | Non-HR |                                                                                                                                                                                                                    |
| ACVD        | NB79      | 3                | 3      | Doxorubicine 35 mg/m <sup>2</sup> d d1 push i.v.                                                                                                                                                                   |
|             | NB82      | 5                | 2      | Cyclophosphamide 150 mg/m <sup>2</sup> d d1-7 1h i.v.                                                                                                                                                              |
|             | NB85      | 3                |        | Vincristine 2.0 mg/m <sup>2</sup> d d8 push i.v.<br>Dacarbazine 250 mg/m <sup>2</sup> d d1-4 1h i.v.                                                                                                               |
| AC          | NB79      | 5                | 5      | Doxorubicine 35 mg/m <sup>2</sup> d d1 push i.v.                                                                                                                                                                   |
|             | NB82      |                  | 4      | Cyclophosphamide 150 mg/m <sup>2</sup> d d1-7 1h i.v.                                                                                                                                                              |
| ASCT        | NB85      | 1                |        | Total body irradiation 2x2 Gy/d d -4 to -2 (12 Gy)<br>Melphalan: 180 mg/m <sup>2</sup> d d -1 push i.v.                                                                                                            |
|             | NB90      | 1                |        | Melphalan 30 mg/m <sup>2</sup> d d -8 to -5 push i.v.<br>Etoposide 50 mg/kgxd d -4 4h i.v.                                                                                                                         |
|             | NB97/2004 | 1                |        | Carboplatinum 500 mg/m <sup>2</sup> d d -4 to -2 1h i.v.<br>Melphalan 45 mg/m <sup>2</sup> d d -8 to -5 push i.v.<br>Etoposide 40 mg/kgxd d -4 4h i.v.<br>Carboplatinum 500 mg/m <sup>2</sup> d d -4 to -2 1h i.v. |
| C           | NB82      |                  | 3      | Cyclophosphamide 5 mg/kgxd d1-5 1h i.v. or p.o.                                                                                                                                                                    |
|             | NB85      |                  | 3      |                                                                                                                                                                                                                    |
| D1          | NB90      | 6                | 6      | Melphalan 8 mg/m <sup>2</sup> d d1-5 oral<br>Etoposide 100 mg/m <sup>2</sup> d d1-5 oral                                                                                                                           |
| D2          | NB90      | 6                | 6      | Vincristine 1.5 mg/m <sup>2</sup> d d1<br>Cyclophosphamide 150 mg/m <sup>2</sup> d d1-7 p.o.                                                                                                                       |
| IVp         | NB85      | 3                |        | Ifosfamide 4 g/m <sup>2</sup> d d1, 3 g/m <sup>2</sup> d d2-3 72h cont. i.v.<br>Etoposide 125 mg/m <sup>2</sup> d d4-5 1h i.v.                                                                                     |
| N1          | NB90      | 4                | 2      | Cisplatinum 40 mg/m <sup>2</sup> d d1-4 (96h cont. i.v.)<br>Etoposide 100 mg/m <sup>2</sup> d d1-4 (96h cont. i.v.)<br>Vindesine 3 mg/m <sup>2</sup> d d1 1h i.v.                                                  |

| Designation | Trial  | Number of cycles |        | Drugs                                                                                                                                                                                                                           |
|-------------|--------|------------------|--------|---------------------------------------------------------------------------------------------------------------------------------------------------------------------------------------------------------------------------------|
|             |        | HR               | Non-HR |                                                                                                                                                                                                                                 |
| N2          | N90    | 4                | 2      | Vincristine 1.5 mg/m <sup>2</sup> d d 1 and 8, 1h i.v.<br>Dacarbazine 200 mg/m <sup>2</sup> d d1-5 1h i.v.<br>Ifosfamide 1.5 g/m <sup>2</sup> d d1-5 120h cont. i.v.<br>Doxorubicine 30 mg/m <sup>2</sup> d d6-7 48h cont. i.v. |
| N3          | NB90   |                  | 1-2    | Doxorubicine 0.5 mg/kgxd d1,8,15,22 push i.v.<br>Vincristine 25 µg/kgxd d1,8,15,22 push i.v.                                                                                                                                    |
| N4          | NB97   | <6 m of age      | 1-4    | Doxorubicine 0.5 mg/kgxd d1,3,5 0.5h i.v.<br>Vincristine 25 µg/kgxd d1,3,5 push i.v.<br>Cyclophosphamide 10 mg/kgxd d1-7 p.o.                                                                                                   |
| N5          | NB97   | 3                | 2      | Cisplatinum 40 mg/m <sup>2</sup> d d1-4 96h cont. i.v.<br>Etoposide 100 mg/m <sup>2</sup> d d1-4 96h cont. i.v.<br>Vindesine 3 mg/m <sup>2</sup> d d1 1h i.v.                                                                   |
| N6          | NB97   | 3                | 2      | Vincristine 1.5 mg/m <sup>2</sup> d d 1 and 8, 1h i.v.<br>Dacarbazine 200 mg/m <sup>2</sup> d d1-5 1h i.v.<br>Ifosfamide 1.5 g/m <sup>2</sup> d d1-5 120h cont. i.v.<br>Doxorubicine 30 mg/m <sup>2</sup> d d6-7 4h i.v.        |
| N7          | NB97   |                  | 4      | Cyclophosphamide 10 mg/kgxd d1-8 p.o.                                                                                                                                                                                           |
| N8          | NB2004 |                  | 2      | Topotecan 1.0 mg/m <sup>2</sup> d d1-7 168h cont. i.v.<br>Cyclophosphamide 100 mg/m <sup>2</sup> d d1-7 1h i.v.<br>Etoposide 100 mg/m <sup>2</sup> d d8-10 1h i.v.                                                              |
| PCVm        | NB82   | 5                | 2      | Cisplatinum 20 mg/m <sup>2</sup> d d1-5 1h i.v. (mod. July 87: 40 mg/m <sup>2</sup> d d1-5)                                                                                                                                     |
|             | NB85   | 3                | 2      | Cyclophosphamide 200 mg/m <sup>2</sup> d d1-5 1h i.v. (omitted July 87)<br>Vepeside 100 mg/m <sup>2</sup> d d5 1h i.v. (mod. July 87: 100 mg/m <sup>2</sup> d d1-5)                                                             |
| RA          | NB97   | 9                |        | Isotretinoin 160 mg/m <sup>2</sup> d d1-14, then 14 days break (months 1-6 and 10-12)<br>(substituting αGD2 antibody therapy during 2002-2004)                                                                                  |
|             | NB2004 | 9                |        | Isotretinoin 160 mg/m <sup>2</sup> d d1-14, then 14 days break (months 1-6 and 10-12)                                                                                                                                           |

**Supplemental Table S3** Treatment schemes for patients with stage 4S neuroblastoma (according for NB 79-NB85 to Evans et al. [9] and for NB 90-NB2204 according to INSS [6])

| Trial      | Surgery                                                    | Chemotherapy                                                                                                                   | Irradiation                           |
|------------|------------------------------------------------------------|--------------------------------------------------------------------------------------------------------------------------------|---------------------------------------|
| NB 79      | No recommendation                                          | No recommendation                                                                                                              | No recommendation                     |
| NB 82      | Biopsy at diagnosis<br>>1year of age: removal of residuals | < 6 months: wait and see<br>Large liver and poor irradiation effect: 3 cycles C (i.v.)<br>> 6 months: 4 cycles ACVD (50% dose) | Large liver: 4.5 (1st choice)         |
| NB 85      | Biopsy at diagnosis<br>2nd surgery 2y after dx             | Large liver and poor irradiation effect: 3 cycles C (p.o.)                                                                     | Large liver: 4.5 – 12 Gy (1st choice) |
| NB 90      | Biopsy at diagnosis<br>2nd surgery 8 months after dx       | Not critically ill: none<br>Critically ill: 1-2 cycles N3                                                                      | Poor chemotherapy effect: 7.5-12 Gy   |
| NB 97/2004 | Biopsy at diagnosis<br>2nd surgery 6-12 months after dx    | No threatening symptoms: none<br>Threatening symptoms: N4 until stop of progression                                            | None                                  |

**Supplemental Table S4** Additional treatment elements in HR neuroblastoma

| Name                  | Trial  | Randomization | Dosage                                                                                                                                                                                            |
|-----------------------|--------|---------------|---------------------------------------------------------------------------------------------------------------------------------------------------------------------------------------------------|
| $\alpha$ GD2 antibody | NB97   | No            | ch14.18 BioInvent 20 mg/m <sup>2</sup> d d1-5 8h i.v., 6 cycles, 1 year (1997-2002)                                                                                                               |
| Interferon $\beta$    | NB79   | Yes           | 2x10 <sup>6</sup> U/m <sup>2</sup> d daily d1-21, 3x/week d 22-230                                                                                                                                |
| mIBG therapy          | NB85   | No            | 100-125 mCi per application, maximal 3 times in patients with mIBG uptake after 6 cycles chemotherapy                                                                                             |
|                       | NB90   | No            | 100-300 mCi in patients with mIBG uptake before ASCT                                                                                                                                              |
|                       | NB97   | No            | 100-300 mCi in patients with mIBG uptake before ASCT                                                                                                                                              |
| Radiotherapy          | NB85   | No            | Unresectable primary tumor after chemotherapy: 24 Gy ( $\leq$ 3y) and 30 Gy ( $>$ 3y)<br>Symptomatic metastases after chemotherapy: 24 Gy ( $\leq$ 3y) and 30 Gy ( $>$ 3y)<br>TBI for ASCT: 12 Gy |
|                       | NB90   | No            | Primary tumor: 24 Gy ( $\leq$ 3y) and 30 Gy ( $>$ 3y)<br>Bone metastases (maximal 4): 24 Gy ( $\leq$ 3y) and 30 Gy ( $>$ 3y)                                                                      |
|                       | NB97   | No            | Primary tumor mIBG uptake after chemotherapy: 36-40 Gy                                                                                                                                            |
|                       | NB2004 | No            | Primary tumor mIBG uptake after chemotherapy: 36-40 Gy                                                                                                                                            |

**Supplemental Table S5** Standard induction and myeloablative chemotherapy 2017 for high-risk neuroblastoma

**Childrens Oncology Group (US) [8]**

***Induction chemotherapy***

Cycle 1 and 2

|                  |                          |       |                 |
|------------------|--------------------------|-------|-----------------|
| Cyclophosphamide | 400 mg/m <sup>2</sup> d, | d1-5, | 30 minutes i.v. |
| Topotecan        | 1.2 mg/m <sup>2</sup> d, | d1-5, | 30 minutes i.v. |

Cycle 3 and 5

|           |                          |       |              |
|-----------|--------------------------|-------|--------------|
| Cisplatin | 50 mg/m <sup>2</sup> d,  | d1-4, | 1 hour i.v.  |
| Etoposide | 200 mg/m <sup>2</sup> d, | d1-3, | 2 hours i.v. |

Cycle 4 and 6

|                  |                          |       |                                                |
|------------------|--------------------------|-------|------------------------------------------------|
| Cyclophosphamide | 2.1 g/m <sup>2</sup> d,  | d1-2, | 6 hours i.v. (+ Mesna 420 mg/m <sup>2</sup> d) |
| Doxorubicine     | 25 mg/m <sup>2</sup> d   | d1-3, | 72 hours continuous infusion                   |
| Vincristine      | 0.67 mg/m <sup>2</sup> d | d1-3, | 72 hours continuous infusion                   |

***Myeloablative chemotherapy (tandem)***

1<sup>st</sup> myeloablative cycle

|                  |                                              |                                       |              |
|------------------|----------------------------------------------|---------------------------------------|--------------|
| Cyclophosphamide | 500 mg/m <sup>2</sup> per dose every 8 hours | 1 hour i.v. up to a total of 12 doses |              |
|                  |                                              | d -5 to -2                            |              |
| Thiotepa         | 900 mg/m <sup>2</sup> d                      | d -7 to -5                            | 2 hours i.v. |

2<sup>nd</sup> myeloablative cycle

|             |                         |            |                              |
|-------------|-------------------------|------------|------------------------------|
| Carboplatin | 375 mg/m <sup>2</sup> d | d -8 to -5 | 96 hours continuous infusion |
| Etoposide   | 300 mg/m <sup>2</sup> d | d -8 to -5 | 96 hours continuous infusion |
| Melphalan   | 60 mg/m <sup>2</sup> d  | 3 days     |                              |

**German Pediatric Oncology**

Cycle 1,3,5

|           |                         |      |                     |
|-----------|-------------------------|------|---------------------|
| Cisplatin | 40 mg/m <sup>2</sup> d  | d1-4 | 96 hours cont. i.v. |
| Etoposide | 100 mg/m <sup>2</sup> d | d1-4 | 96 hours cont. i.v. |
| Vindesine | 3 mg/m <sup>2</sup> d   | d1   | 1 hour i.v.         |

Cycle 2,4,6

|              |                         |       |                                                      |
|--------------|-------------------------|-------|------------------------------------------------------|
| Vincristine  | 1.5 mg/m <sup>2</sup> d | d1, 8 | 1 hour i.v.                                          |
| dacarbazine  | 200 mg/m <sup>2</sup> d | d1-5  | 1 hour i.v.                                          |
| ifosfamide   | 1.5 g/m <sup>2</sup> d  | d1-5  | 120 hours cont. i.v (+Mesna 900 mg/m <sup>2</sup> d) |
| doxorubicine | 30 mg/m <sup>2</sup> d  | d6-7  | 4 hours i.v                                          |

***Myeloablative chemotherapy***

|             |                          |            |                 |
|-------------|--------------------------|------------|-----------------|
| Melphalan   | 45 mg/m <sup>2</sup> xd  | d -8 to -5 | 30 minutes i.v. |
| Etoposide   | 40 mg/kgxd               | d -4       | 4 hours i.v.    |
| Carboplatin | 500 mg/m <sup>2</sup> xd | d -4 to -2 | 1 hours i.v.    |

**Japan Children's Cancer Group [10]*****Induction chemotherapy***Cycle 1

|                  |                         |      |                      |
|------------------|-------------------------|------|----------------------|
| Cyclophosphamide | 1.2 g/m <sup>2</sup> d, | d1   | 1 hour i.v.          |
| Vincristine      | 1.5 mg/m <sup>2</sup> d | d1   | bolus i.v.           |
| Pirarubicine     | 40 mg/m <sup>2</sup> d  | d3   | 1 hour or bolus i.v. |
| Cisplatin        | 20 mg/m <sup>2</sup> d  | d1-5 | 120 hours cont. i.v. |

Cycle 2,3,4,5

|                  |                         |      |                      |
|------------------|-------------------------|------|----------------------|
| Cyclophosphamide | 1.2 g/m <sup>2</sup> d, | d1-2 | 1 hour i.v.          |
| Vincristine      | 1.5 mg/m <sup>2</sup> d | d1   | bolus i.v.           |
| Pirarubicine     | 40 mg/m <sup>2</sup> d  | d3   | 1 hour or bolus i.v. |
| Cisplatin        | 20 mg/m <sup>2</sup> d  | d1-5 | 120 hours cont. i.v. |

***Myeloablative chemotherapy***

|           |                                                                            |            |                         |
|-----------|----------------------------------------------------------------------------|------------|-------------------------|
| Busilvex  | 0.8-1.2 mg/m <sup>2</sup> per dose every 6 hours up to a total of 16 doses | d -7 to -4 | i.v. push or short time |
| Melphalan | 90 mg/m <sup>2</sup> d                                                     | d -3 to -2 | i.v. push or short time |

**Memorial Sloan Kettering Cancer Center (US) [11]*****Induction chemotherapy***Cycle 1,2,4

|                  |                          |       |                              |
|------------------|--------------------------|-------|------------------------------|
| Cyclophosphamide | 2.1 g/m <sup>2</sup> d,  | d1-2, | 6 hours i.v.                 |
| Doxorubicine     | 25 mg/m <sup>2</sup> d   | d1-3, | 72 hours continuous infusion |
| Vincristine      | 0.67 mg/m <sup>2</sup> d | d1-3, | 72 hours continuous infusion |

Cycle 3 and 5

|           |                          |       |              |
|-----------|--------------------------|-------|--------------|
| Cisplatin | 50 mg/m <sup>2</sup> d,  | d1-4, | 1 hour i.v.  |
| Etoposide | 200 mg/m <sup>2</sup> d, | d1-3, | 2 hours i.v. |

***Myeloablative chemotherapy***

none

**SIOP Europe Neuroblastoma Group (SIOPEN) [12]*****Induction chemotherapy***Rapid COJEC d1-80

|                  |                           |                            |                                          |
|------------------|---------------------------|----------------------------|------------------------------------------|
| Cyclophosphamide | 1.050 mg/m <sup>2</sup> d | d20,21 and d60,61          | push i.v. (+Mesna 1.2g/m <sup>2</sup> d) |
| Vincristine      | 1.5 mg/m <sup>2</sup> d   | d0,10,20,30,40,50,60,70,80 | push i.v.                                |
| Carboplatin      | 750 mg/m <sup>2</sup> d   | d0,40                      | 1 hour i.v.                              |
| Etoposide        | 175 mg/m <sup>2</sup> d   | d0,20,40,60                | 4 hours i.v.                             |
| Cisplatin        | 80 mg/m <sup>2</sup> d    | d10,30,50                  | 24 hours i.v.                            |

***Myeloablative chemotherapy***

|           |                                                                            |            |                         |
|-----------|----------------------------------------------------------------------------|------------|-------------------------|
| Busilvex  | 0.8-1.2 mg/m <sup>2</sup> per dose every 6 hours up to a total of 16 doses | d -7 to -3 | i.v. push or short time |
| Melphalan | 140 mg/m <sup>2</sup> d                                                    | d -2       | i.v. push               |



**Supplemental Table S6** Sites of primary tumors by trial (all stages)\*

| Trial     | Patients (N) | Primary tumors (N) | Cervical (%) | Thoracic (%) | Abdominal nonadrenal (%) | Adrenal (%) | Unknown (%) | Other (%) |
|-----------|--------------|--------------------|--------------|--------------|--------------------------|-------------|-------------|-----------|
| NB79      | 188          | 190                | 4.7          | 14.2         | 24.2                     | 52.6        | 4.2         | 0.0       |
| NB82      | 216          | 220                | 5.9          | 14.5         | 29.5                     | 47.7        | 1.8         | 0.5       |
| NB85      | 406          | 415                | 3.6          | 15.2         | 27.2                     | 51.8        | 2.2         | 0.0       |
| NB90      | 933          | 968                | 3.1          | 15.9         | 28.4                     | 50.4        | 2.1         | 0.1       |
| NB97      | 1200         | 1238               | 3.6          | 16.8         | 28.2                     | 50.9        | 0.6         | 0.0       |
| NB2004    | 1520         | 1610               | 4.0          | 16.0         | 30.7                     | 48.4        | 0.8         | 0.1       |
| NB79-2004 | 4463         | 4641               | 3.8          | 16.0         | 28.9                     | 49.9        | 1.3         | 0.1       |

\*178 patients (4.0%) had multiple primary tumors (each counted) or primary tumors at overlapping sites (each counted). Therefore, the number of primary sites exceeds the number of patients by 5.8%.

**Supplemental Table S7** Sites of metastases in patients with stage 4  $\geq$  18 months old by trial

| Trial          | <i>N</i> | Bone marrow (%) | Bone (%) | OM (%) | Lymph nodes (%) | Liver (%) | Skin (%) | Lung/Pleura (%) | Intra-cranial (%) | Other (%) |
|----------------|----------|-----------------|----------|--------|-----------------|-----------|----------|-----------------|-------------------|-----------|
| NB79           | 73       | 83.6            | 72.6     | 94.5   | 20.5            | 24.7      | 1.4      | 2.7             | 4.1               | 1.4       |
| NB82           | 70       | 75.7            | 71.4     | 94.3   | 15.7            | 14.3      | 1.4      | 0.0             | 7.1               | 0.0       |
| NB85           | 129      | 88.4            | 60.5     | 91.5   | 25.6            | 11.6      | 0.8      | 0.8             | 8.5               | 0.0       |
| NB90           | 294      | 86.7            | 63.3     | 93.2   | 19.4            | 16.7      | 0.3      | 4.8             | 6.8               | 1.4       |
| NB97           | 281      | 91.5            | 72.6     | 97.5   | 21.4            | 10.0      | 0.0      | 5.0             | 6.8               | 1.1       |
| NB2004         | 428      | 93.0            | 59.8     | 96.0   | 20.6            | 10.5      | 0.2      | 6.5             | 5.1               | 4.0       |
| NB79-2004      | 1275     | 89.3            | 64.9     | 95.1   | 20.7            | 12.9      | 0.4      | 4.6             | 6.3               | 2.0       |
| <i>P</i> value |          | < 0.001         | 0.086    | 0.070  | 0.951           | 0.002     | n.s.     | 0.003           | 0.537             | n.s.      |

*N* number of patients, n.s. not significant, OM osteomedullary metastases (=bone marrow and/or bone).

**Supplemental Table S8** Proportions of 5, 10, 15 and 20-year event-free survival of neuroblastoma subgroups

| Trial/ <i>MYCN</i> | Stage/age    | <i>N</i> | 5-year EFS % | 10-year EFS % | 15-year EFS % | 20-year EFS % |
|--------------------|--------------|----------|--------------|---------------|---------------|---------------|
| NB79-NB2004        | All stages   | 4463     | 59±1         | 57±1          | 56±1          | 53±1          |
| NB79               |              | 188      | 44±4         | 44±4          | 43±4          | 39±4          |
| NB82               |              | 216      | 49±3         | 48±3          | 48±3          | 45±4          |
| NB85               |              | 406      | 53±2         | 51±3          | 50±3          | 47±3          |
| NB90               |              | 933      | 59±2         | 58±2          | 56±2          | 55±2          |
| NB97               |              | 1200     | 65±1         | 63±1          | 62±1          | 62±1          |
| NB2004             |              | 1520     | 58±2         | 55±2          | 55±2          | N.A.          |
| NB79-NB2004        | Stages 1-3   | 2290     | 78±1         | 76±1          | 76±1          | 73±1          |
| NB79               |              | 80       | 82±5         | 80±5          | 80±5          | 76±6          |
| NB82               |              | 102      | 75±4         | 74±4          | 74±4          | 71±5          |
| NB85               |              | 198      | 78±3         | 76±3          | 76±3          | 71±4          |
| NB90               |              | 450      | 82±2         | 81±2          | 81±2          | 79±2          |
| NB97               |              | 695      | 79±2         | 77±2          | 76±2          | 76±2          |
| NB2004             |              | 765      | 73±2         | 71±2          | 71±3          | N.A.          |
| NB79-NB2004        | Stage 4S     | 482      | 73±2         | 72±2          | 72±2          | 72±2          |
| NB79               |              | 20       | 70±10        | 70±10         | 70±10         | 70±10         |
| NB82               |              | 21       | 67±10        | 67±10         | 67±10         | 67±10         |
| NB85               |              | 37       | 78±7         | 72±7          | 72±7          | 72±7          |
| NB90               |              | 94       | 73±5         | 73±5          | 73±5          | 73±5          |
| NB97               |              | 119      | 75±4         | 75±4          | 75±4          | 75±4          |
| NB2004             |              | 191      | 73±4         | 71±4          | 71±4          | N.A.          |
| NB79-NB2004        | Stage 4 ≥18m | 1276     | 24±1         | 22±1          | 19±1          | 18±1          |
| NB79               |              | 73       | 3±2          | 3±2           | 0             | 0             |
| NB82               |              | 70       | 13±4         | 11±4          | 11±4          | 11±4          |
| NB85               |              | 129      | 14±3         | 11±3          | 10±3          | 8±3           |
| NB90               |              | 294      | 25±3         | 22±2          | 19±2          | 18±2          |

| Trial/ <i>MYCN</i> | Stage/age                     | <i>N</i> | 5-year EFS % | 10-year EFS % | 15-year EFS % | 20-year EFS % |
|--------------------|-------------------------------|----------|--------------|---------------|---------------|---------------|
| NB97               |                               | 281      | 32±3         | 29±3          | 27±3          | 27±3          |
| NB2004             |                               | 429      | 28±3         | 24±3          | 24±3          | N.A.          |
| MNA NB90-2004      | All                           | 587      | 33±2         | 29±2          | 29±2          | 29±2          |
|                    | Stage 1                       | 14       | 54±14        | 40±16         | 40±16         | N.A.          |
|                    | Stage 2                       | 30       | 51±10        | 51±10         | 51±10         | N.A.          |
|                    | Stage 3                       | 100      | 51±5         | 43±5          | 43±5          | 43±5          |
|                    | Stage 4 <18m                  | 118      | 29±4         | 29±4          | 29±4          | 29±4          |
|                    | Stage 4S                      | 39       | 41±8         | 41±8          | 41±8          | 41±8          |
|                    | Stages 1,2,3,4S, stage 4 <18m | 301      | 41±3         | 37±3          | 37±3          | 37±3          |
|                    | Stage 4 ≥18m                  | 285      | 24±3         | 21±3          | 21±3          | 21±3          |
| No MNA NB90-2004   | All                           | 2664     | 67±1         | 65±1          | 63±1          | 62±1          |
|                    | Stage 1                       | 636      | 91±1         | 91±1          | 90±1          | 90±1          |
|                    | Stage 2                       | 462      | 75±2         | 73±2          | 72±2          | 72±2          |
|                    | Stage 3                       | 456      | 67±2         | 64±2          | 64±2          | 64±2          |
|                    | Stage 4 <18m                  | 178      | 73±3         | 72±3          | 67±4          | 67±4          |
|                    | Stage 4S                      | 309      | 77±3         | 76±3          | 76±3          | 76±3          |
|                    | Stages 1,2,3,4S, stage 4 <18m | 2041     | 78±1         | 77±1          | 76±1          | 76±1          |
|                    | Stage 4 ≥18m                  | 623      | 31±2         | 27±2          | 23±2          | 21±2          |

m months, MNA *MYCN* amplification, *N* number of patients, N.A. not applicable

**Supplemental Table S9** Proportions of 5, 10, 15 and 20-year overall survival of neuroblastoma subgroups

| Trial/ <i>MYCN</i> | Stage/age    | <i>N</i> | 5-year OS % | 10-year OS % | 15-year OS % | 20-year OS % |
|--------------------|--------------|----------|-------------|--------------|--------------|--------------|
| NB79-NB2004        | All stages   | 4463     | 70±1        | 67±1         | 66±1         | 63±1         |
| NB79               |              | 188      | 47±4        | 46±4         | 46±4         | 41±4         |
| NB82               |              | 216      | 56±3        | 53±3         | 53±4         | 52±4         |
| NB85               |              | 406      | 58±3        | 56±2         | 55±3         | 53±3         |
| NB90               |              | 933      | 66±2        | 63±2         | 61±2         | 59±2         |
| NB97               |              | 1200     | 79±1        | 75±1         | 74±1         | 71±2         |
| 2004               |              | 1520     | 76±1        | 72±1         | 70±2         | N.A.         |
| NB79-NB2004        | Stages 1-3   | 2290     | 90±1        | 89±1         | 88±1         | 86±1         |
| NB79               |              | 80       | 84±4        | 83±4         | 83±4         | 80±4         |
| NB82               |              | 102      | 81±4        | 80±4         | 80±4         | 77±4         |
| NB85               |              | 198      | 84±3        | 83±3         | 82±3         | 81±3         |
| NB90               |              | 450      | 89±2        | 87±2         | 86±2         | 86±2         |
| NB97               |              | 695      | 93±1        | 92±1         | 92±1         | 89±1         |
| NB2004             |              | 765      | 93±1        | 91±1         | 91±1         | N.A.         |
| NB79-NB2004        | Stage 4S     | 482      | 84±2        | 82±2         | 82±2         | 78±2         |
| NB79               |              | 20       | 80±9        | 80±9         | 80±9         | 71±9         |
| NB82               |              | 21       | 76±9        | 71±10        | 71±10        | 71±10        |
| NB85               |              | 37       | 86±6        | 86±6         | 86±6         | 78±10        |
| NB90               |              | 94       | 81±4        | 79±4         | 79±4         | 79±4         |
| NB97               |              | 119      | 88±3        | 84±3         | 84±3         | 84±3         |
| NB2004             |              | 191      | 85±3        | 85±3         | 85±3         | N.A.         |
| NB79-NB2004        | Stage 4 ≥18m | 1276     | 35±1        | 28±1         | 25±1         | 23±1         |
| NB79               |              | 73       | 04±2        | 2±2          | 0            | 0            |
| NB82               |              | 70       | 22±5        | 17±5         | 17±5         | 17±5         |
| NB85               |              | 129      | 16±3        | 12±3         | 11±3         | 11±3         |
| NB90               |              | 294      | 31±3        | 26±3         | 23±3         | 20±3         |

| Trial/ <i>MYCN</i> | Stage/age                     | <i>N</i> | 5-year OS % | 10-year OS % | 15-year OS % | 20-year OS % |
|--------------------|-------------------------------|----------|-------------|--------------|--------------|--------------|
| NB97               |                               | 281      | 44±3        | 33±3         | 31±3         | 31±3         |
| NB2004             |                               | 429      | 47±3        | 38±3         | 33±3         | N.A.         |
| MNA NB90-NB2004    | All                           | 587      | 41±2        | 38±2         | 36±2         | 36±2         |
|                    | Stage 1                       | 14       | 92±7        | 92±7         | 69±21        | 69±21        |
|                    | Stage 2                       | 30       | 57±10       | 57±10        | 57±10        | N.A.         |
|                    | Stage 3                       | 100      | 56±5        | 54±5         | 51±5         | 51±6         |
|                    | Stage 4 <18m                  | 118      | 37±5        | 37±5         | 37±5         | 37±5         |
|                    | Stage 4S                      | 39       | 45±8        | 41±9         | 41±9         | 41±9         |
|                    | Stages 1,2,3,4S, stage 4 <18m | 301      | 49±3        | 48±3         | 45±3         | 45±4         |
|                    | Stage 4 ≥18m                  | 285      | 34±3        | 26±3         | 26±3         | 26±3         |
| No MNA NB90-NB2004 | All                           | 2664     | 82±1        | 78±1         | 76±1         | 72±1         |
|                    | Stage 1                       | 636      | 98±1        | 91±1         | 90±1         | 90±1         |
|                    | Stage 2                       | 462      | 97±1        | 96±1         | 94±1         | 88±1         |
|                    | Stage 3                       | 456      | 89±2        | 86±2         | 86±2         | 86±2         |
|                    | Stage 4 <18m                  | 178      | 88±3        | 87±3         | 82±3         | 76±6         |
|                    | Stage 4S                      | 309      | 90±2        | 89±2         | 89±2         | 89±2         |
|                    | Stages 1,2,3,4S Stage 4 <18m  | 2041     | 94±1        | 94±1         | 92±1         | 91±1         |
|                    | Stage 4 ≥18m                  | 623      | 47±2        | 37±2         | 32±2         | 26±4         |

m months, MNA *MYCN* amplification, *N* number of patients, N.A. not applicable

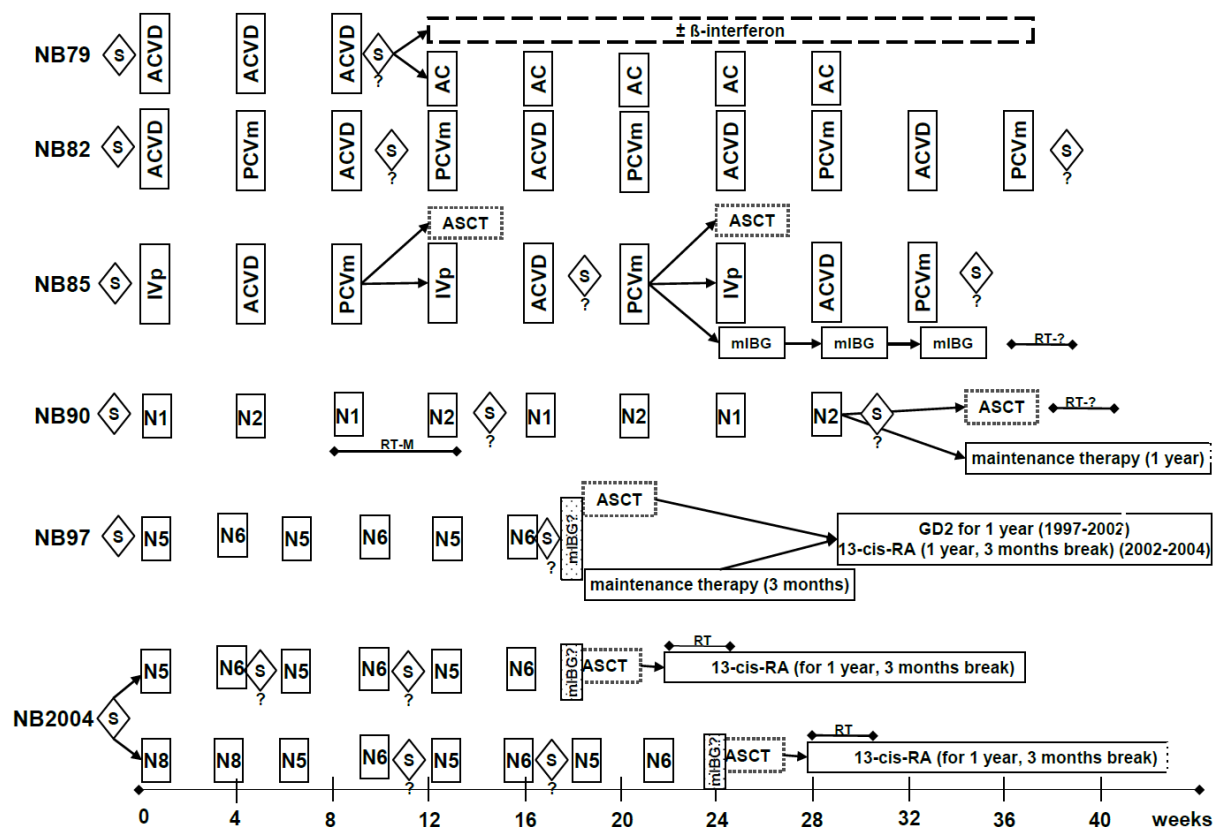

**Supplemental Fig. S1** Schematic overview of the treatment elements for high-risk neuroblastoma therapy for the trials NB79-NB2004. For details, see Supplemental Tables S1-S4. Abbreviations:

- AC chemotherapy cycle (doxorubicine,cyclophosphamide)
- ACVD chemotherapy cycle (doxorubicine,cyclophosphamide, vincristine, dacarbazine)
- ASCT autologous stem cell transplantation (different myeloablative regimens)
- C chemotherapy cycle (cyclophosphamide)
- 13-cis-RA 13-cis-retinoic acid (isotretinoin)
- GD2 antibody therapy using antiGd2 antibody
- IVp chemotherapy cycle (ifosfamide, etoposide)
- mIBG ? irradiation using metaiodinebenzylguanidine (if indicated)
- N1 chemotherapy cycle (cisplatinum, etoposide, vindesine)
- N2 chemotherapy cycle (vincristine, dacarbazine, ifosfamide, doxorubicine)
- N5 chemotherapy cycle (cisplatinum, etoposide, vindesine)
- N6 chemotherapy cycle (vincristine, dacarbazine, ifosfamide, doxorubicine)
- N7 chemotherapy cycle (cyclophosphamide)
- N8 chemotherapy cycle (topotecan, cyclophosphamide, etoposide)
- PCV/m chemotherapy cycle (cisplatinum, cyclophosphamide, vepeside)
- RT ? radiotherapy of the primary tumor (external beam irradiation, if indicated)
- RT-M ? radiotherapy of metastases (external beam irradiation, if indicated)
- S surgery
- S? second look surgery (if indicated)

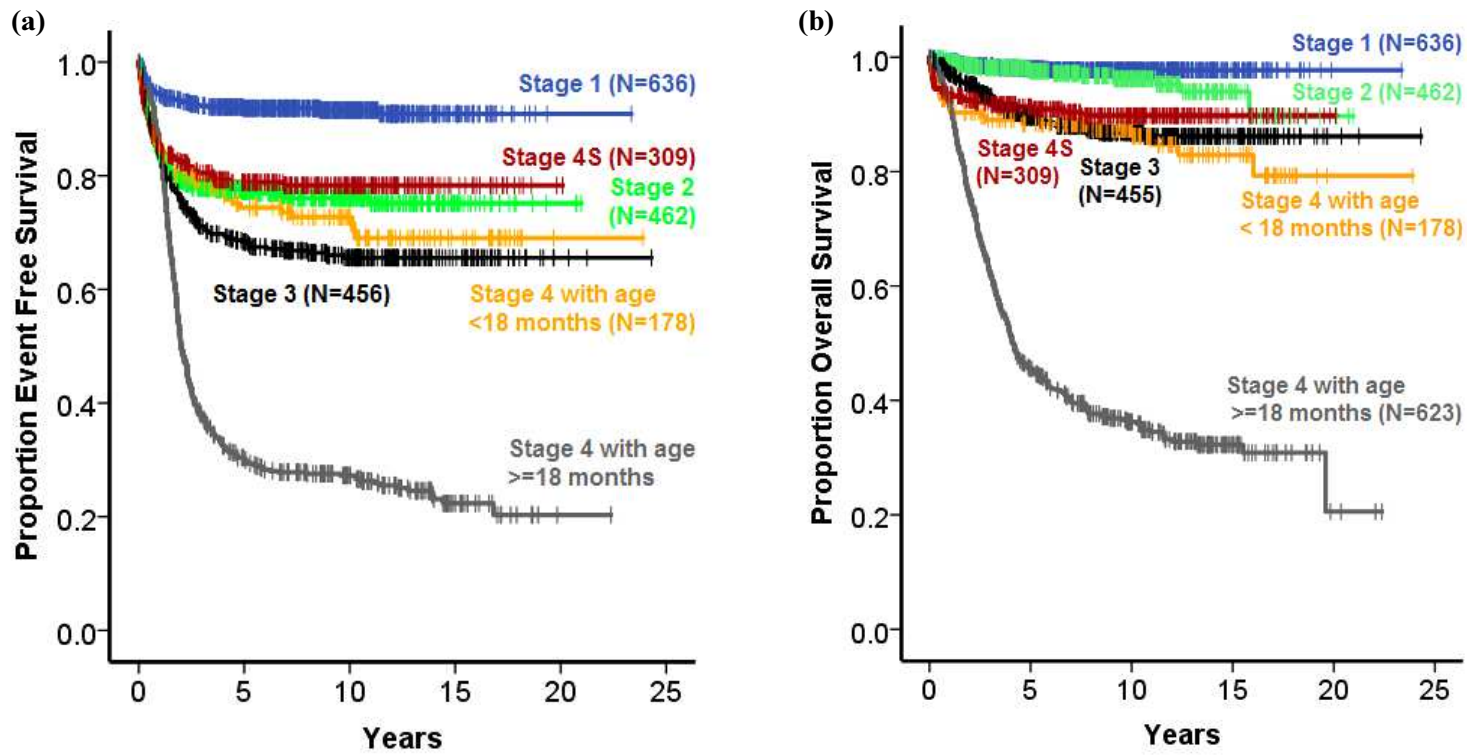

**Supplemental Fig. S2** Survival of 2664 patients with non-amplified *MYCN* neuroblastoma by stage and age. Trials NB90, NB97, NB2004. **a** Event-free survival. **b** Overall survival
